# Supplementary material for: Novel Catalyst Composites of Ni- and Co-Based Nanoparticles Supported on Inorganic Oxides for Fatty Acid Hydrogenations
Source: MDPI journal article supplement (doi:10.3390/nano13091435), 2023-04-22
Supplement: s1 [file s1]

## Supplementary Materials

### Contents:

#### 1. General experimental section

#### 2. Figures

#### 3. Tables

### 1. General experimental section

All reagents were acquired from commercial suppliers and used as received: bis(1,5-cyclooctadiene)nickel(0) (Strem, 98%), tris(trans-1,2-bis(4-*tert*-butylphenyl)ethene)nickel(0) (Strem, 97%), dicobalt octacarbonyl (Sigma-Aldrich, ≥90%), quinidine (Acros Organics, 98%), halloysite nanoclay (Sigma-Aldrich), oleic acid (Sigma-Aldrich, 95%), linoleic acid (Fluorochem, 94%), linolenic acid (Fluorochem, 70%), elaidic acid (Acros Organics, 98%), 1,4-dimethoxybenzene (Aldrich, 99%). Halloysites and quinidine were dried under vacuum at 80 °C overnight prior to use. Glycerol was degassed and dried under vacuum at 120 °C overnight prior to use. NMR spectra of reaction crudes were recorded on a Bruker Advance 300 spectrometer at 293 K (300 MHz for  $^1\text{H}$  NMR and 75.4 MHz for  $^{13}\text{C}$  NMR) at the NMR service of “Institut de Chimie de Toulouse” and chemical shifts were calibrated relative to residual solvent peak. IR spectra were recorded in the range of 4000-400  $\text{cm}^{-1}$  on a Thermo Nicolet 6700 FT-IR Spectrometer at the infrared and Raman service of “Institut de Chimie de Toulouse”. X-ray powder diffraction analyses were recorded at room temperature on a PANalytical X'Pert Pro MPD ( $\theta$ - $\theta$ ) diffractometer or on a MiniFlex Rigaku ( $\theta$ -2 $\theta$ ) diffractometer at the XRD service of the Coordination Chemistry Laboratory of Toulouse, using Cu  $K_{\alpha 1, \alpha 2}$  radiation ( $\lambda = 1.54059, 1.54442 \text{ \AA}$ ). X-Ray diffraction patterns were collected at room temperature on a PANalytical X'Pert MPD Pro ( $\theta$ - $\theta$ ) diffractometer using Cu  $K_{\alpha 1, \alpha 2}$  radiation. GC analyses were performed on a GC Perkin Elmer Clarus 500 with a flame ionization detector (FID) using a SGE BPX5 column (30 m  $\times$  0.32 mm  $\times$  0.25 mm) composed of 5% phenylmethylsiloxane. The injector temperature was 250 °C and the flow was 2 mL/min. The temperature programme was 45 °C for 2 min, 20 °C/min to 300 °C, hold for 5 min. Elemental and ICP-AES analyses were carried out at the elemental analysis service of the Coordination Chemistry Laboratory of Toulouse using a Perkin Elmer 2400 series II analyzer and an iCAP 6300 ICP Spectrometer. Metallic content was determined after sample digestion with aqua regia followed by a dilution of the mixture with HCl 1% (v/v) by inductively coupled plasma atomic emission spectroscopy (ICP-AES) using a Thermo Scientific ICP 6300 instrument. Magnetic data were collected with a Quantum Design MPMS-X SQUID magnetometer working in the range 2–400 K with the magnetic field up to X Tesla at the magnetism service of the Coordination Chemistry Laboratory of Toulouse. TEM images of nanoparticles both in solid state and dispersed in glycerol were obtained from transmission electron microscopes JEOL JEM 1400 running at 120 kV. HR-TEM from JEOL JEM 2100F running at 200 kV equipped with X-EDS (detection of light elements, resolution 135 eV) at the Centre Raimond Castaing of Toulouse. The nanoparticles size, distribution and average diameter were determined from TEM images with Image-J software associated to a Microsoft Excel macro developed by Christian Pradel. X-ray photoelectron spectroscopy (XPS) experiments were carried

out at the Institute of Analytical Sciences and Physico-Chemistry for Environment and Materials (IPREM) using a Thermo Scientific K-alpha spectrometer, with a monochromatized Al K $\alpha$  radiation ( $h\nu = 1486.6$  eV). As prepared powder samples were grinded in an agate mortar for 3 min in an Ar filled glove box connected to the spectrometer ( $\text{H}_2\text{O}$  and  $\text{O}_2 < 1$  ppm), deposited on a sample holder using a carbon conductive tape, then immediately transferred in the spectrometer. Measurements were performed at about  $10^{-7}$  Pa with an X-ray power of 72 W (12 kV, 6 mA), corresponding to a 400  $\mu\text{m}$  beam diameter. A dual beam charge neutralization system (low energy electrons and  $\text{Ar}^+$  ions flood) was used to avoid charging effect during acquisition. Survey and core level spectra were recorded using 200 or 20 eV as pass energy and 1 or 0.1 eV step, respectively. CasaXPS software was used for peaks fitting. Energy calibration was performed from the C-C, C-H peak at 285.0 eV while non-linear Shirley-type background was used with 70% Gaussian - 30% Lorentzian Voigt peak shapes. Quantification were performed using the Scofield cross-sections database. To fit the Ni 2p $_{3/2}$  core level spectra, envelopes corresponding to the Ni 2p $_{3/2}$  core level spectra of Ni metal, NiO and Ni(OH) $_2$  reference compounds were used. Note that the Shirley-type background used for the Ni 2p $_{3/2}$  fit was adjusted at high energy with a slight offset to improve the fitting corresponding of the satellite peaks area, as previously proposed by Biesinger et al.<sup>1</sup> To fit the Co 2p $_{3/2}$  core level spectra, envelopes corresponding to the Co 2p $_{3/2}$  core level spectra of Co metal, Co $_3\text{O}_4$ , CoO, Co(OH) $_2$  and reference compounds were used. Both Ni and Co reference compounds were recorded in the same analysis conditions while their corresponding maximum peak positions are in good agreement with the literature [1-3]. X ray absorption spectroscopy (XAS) was performed on TEMPO beamline at the Synchrotron SOLEIL [4]. XAS was carried out in partial electron yield by measuring secondary photoelectrons at fixed kinetic energy as a function of the photon energy. Secondary photoelectrons were measured using a hemispherical electron analyzer MBS-A1 equipped with a fast delay line detector. Experimental Nickel and Cobalt absorption spectra were measured at L $_{2,3}$  absorption edge.

1. Biesinger, M.C.; Payne, B.P.; Lau, L.W.M.; Gerson, A.; Smart, R.S.C. X-ray photoelectron spectroscopic chemical state quantification of mixed nickel metal, oxide and hydroxide systems. *Surf. Interface Anal.* **2009**, *41*, 324–332. doi:10.1002/sia.3026.
2. Biesinger, M.C.; Lau, L.W.; Gerson, A.R.; Smart, R.S.C. The role of the Auger parameter in XPS studies of nickel metal, halides and oxides. *Phys. Chem. Chem. Phys.* **2012**, *14*, 2434–2442.
3. Biesinger, M.C.; Payne, B.P.; Grosvenor, A.P.; Lau, L.W.M.; Gerson, A.R.; Smart, R.S.C. Resolving surface chemical states in XPS analysis of first row transition metals, oxides and hydroxides: Cr, Mn, Fe, Co and Ni. *Appl. Surf. Sci.* **2011**, *257*, 2717–2730, doi:10.1016/j.apsusc.2010.10.051.
4. Polack, F.; Silly, M.; Chauvet, C.; Lagarde, B.; Bergeard, N.; Izquierdo, M.; Chubar, O.; Krizmancic, D.; Ribbens, M.; Duval, J.P.; et al. TEMPO: a New Insertion Device Beamline at SOLEIL for Time Resolved Photoelectron Spectroscopy Experiments on Solids and Interfaces. *AIP Conf. Proc.* **2010**, *1234*, 185–188, doi:10.1063/1.3463169.

## 2. Figures

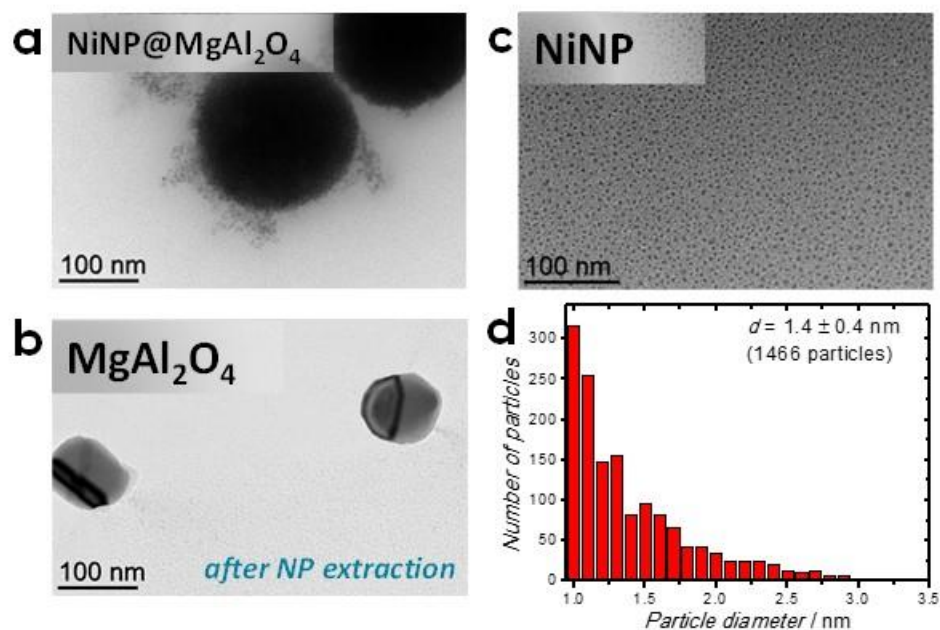

**Figure S1.** TEM image of NiNP@MgAl<sub>2</sub>O<sub>4</sub> (a), MgAl<sub>2</sub>O<sub>4</sub> (b), and NiNP (c) after extraction with glycerol size histogram of the isolated NiNP.

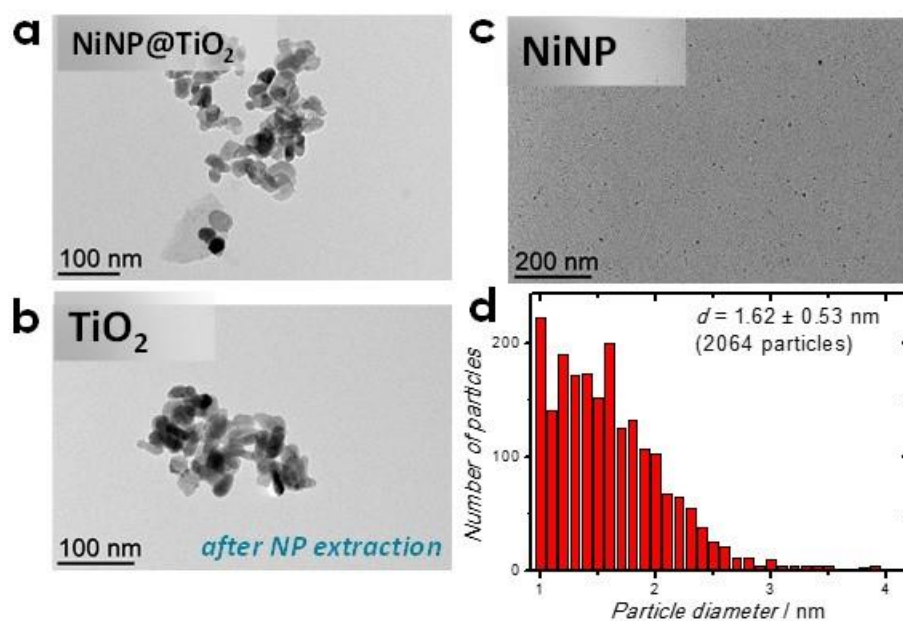

**Figure S2.** TEM image of NiNP@TiO<sub>2</sub> (a), TiO<sub>2</sub> (b), and NiNP (c) after extraction with glycerol size histogram of the isolated NiNP.

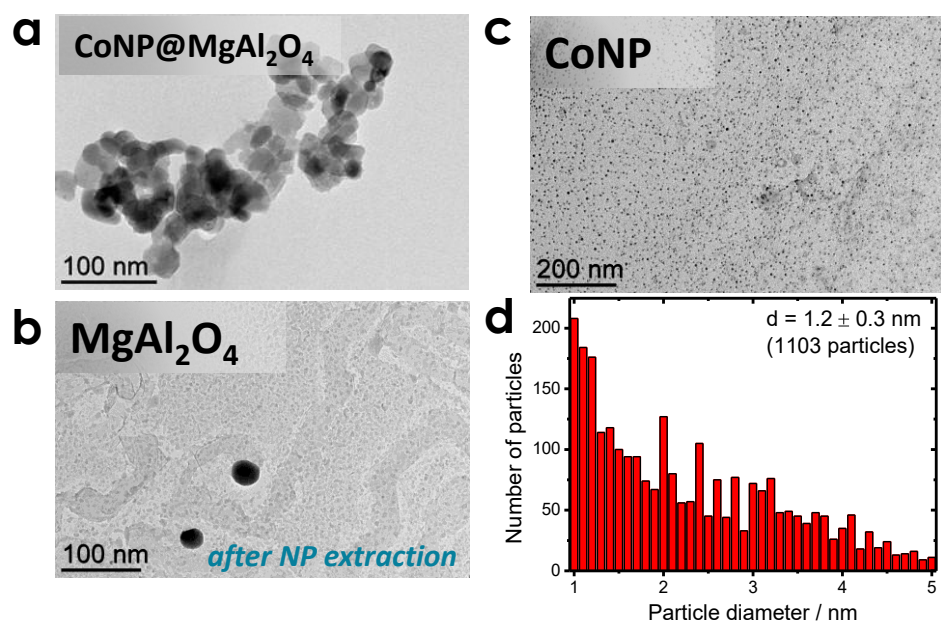

**Figure S3.** TEM image of CoNP@MgAl<sub>2</sub>O<sub>4</sub> (a), MgAl<sub>2</sub>O<sub>4</sub> (b), and CoNP (c) after extraction with glycerol size histogram of the isolated CoNP.

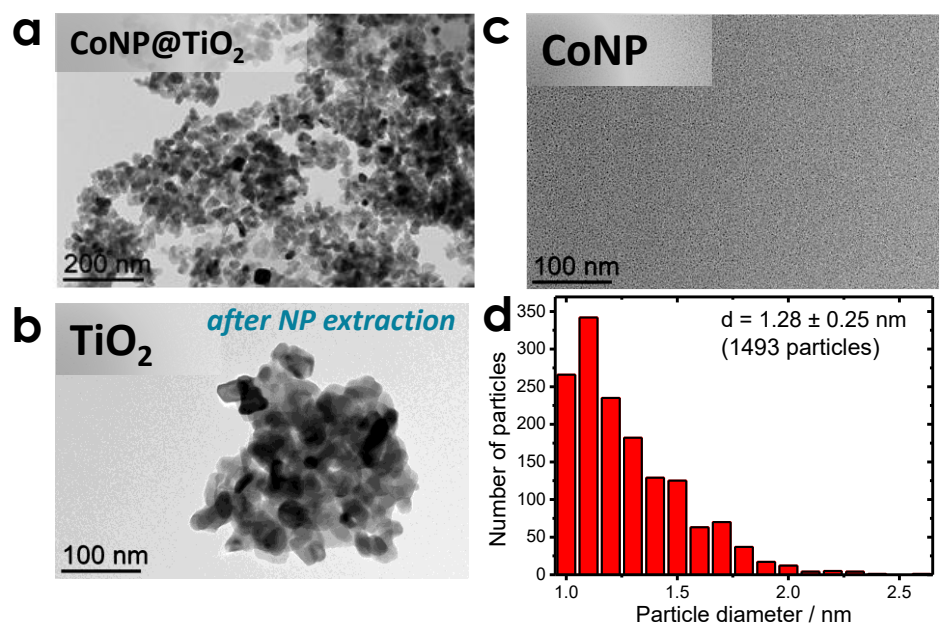

**Figure S4.** TEM image of CoNP@TiO<sub>2</sub> (a), TiO<sub>2</sub> (b), and CoNP (c) after extraction with glycerol size histogram of the isolated CoNP.

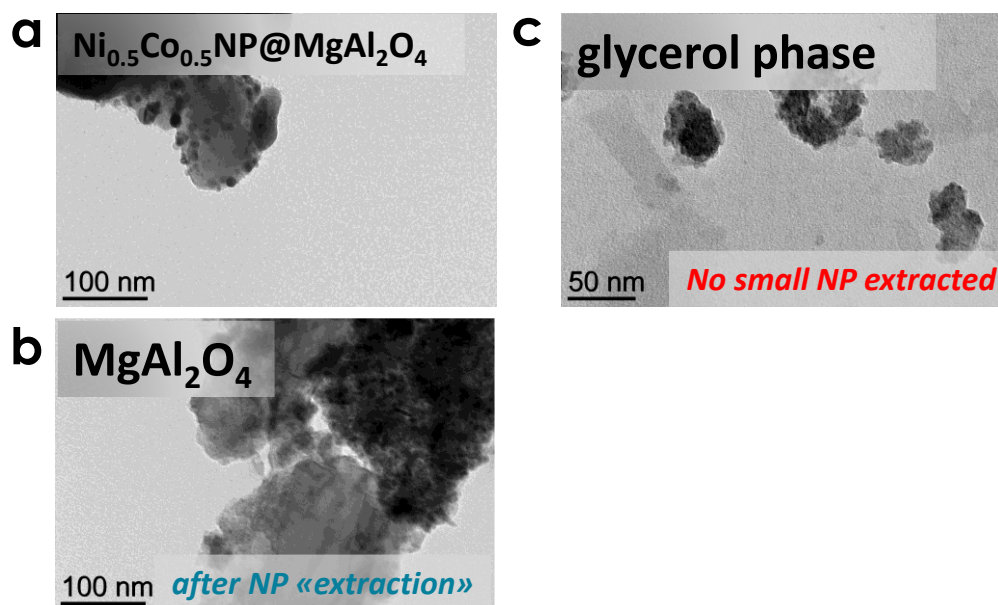

**Figure S5.** TEM images of  $\text{NiCoNP@MgAl}_2\text{O}_4$  (a),  $\text{MgAl}_2\text{O}_4$  support after extraction of NiCoNP in glycerol (b), and glycerol phase (c).

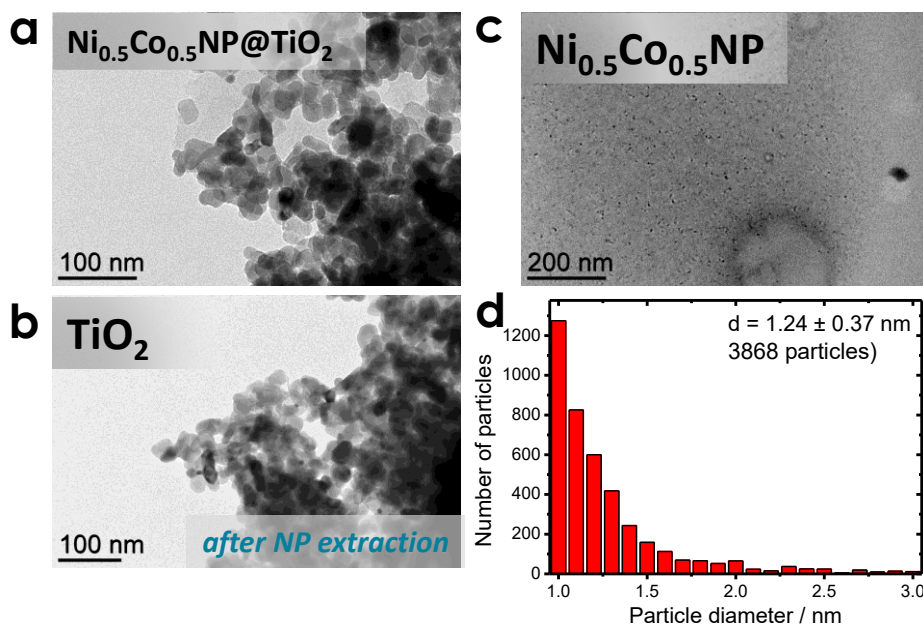

**Figure S6.** TEM images of  $\text{NiCoNP@TiO}_2$  (a),  $\text{TiO}_2$  support after extraction of NiCoNP in glycerol (b), and extracted NiCoNP (c). Size distribution (d) for extracted NiCoNP.



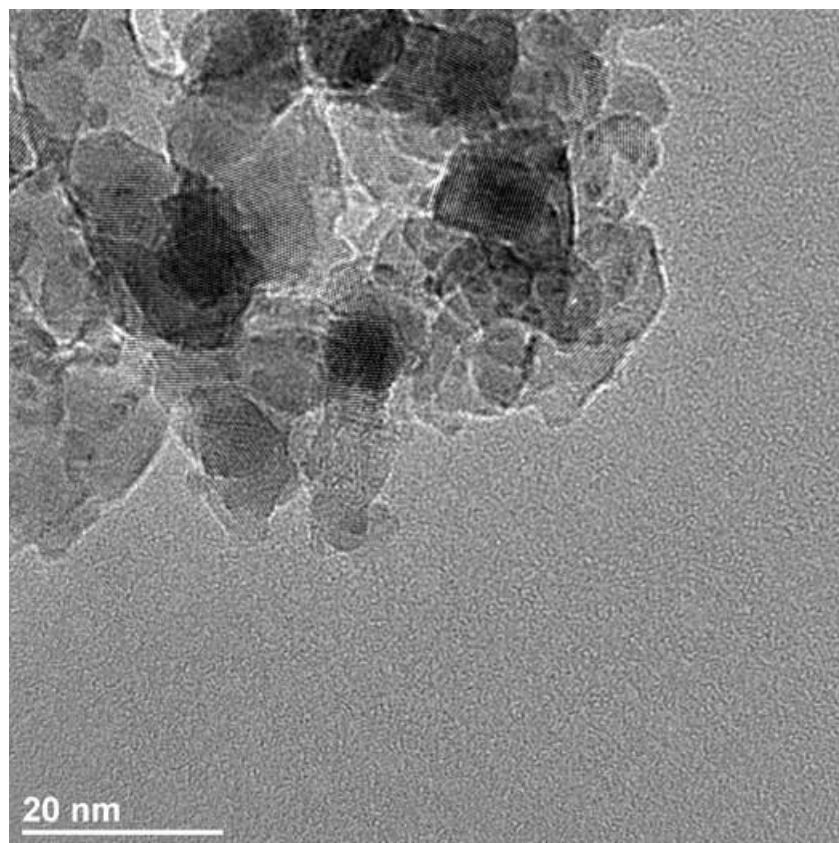

**Figure S7.** HRTEM image for NiCoNP@TiO<sub>2</sub>.

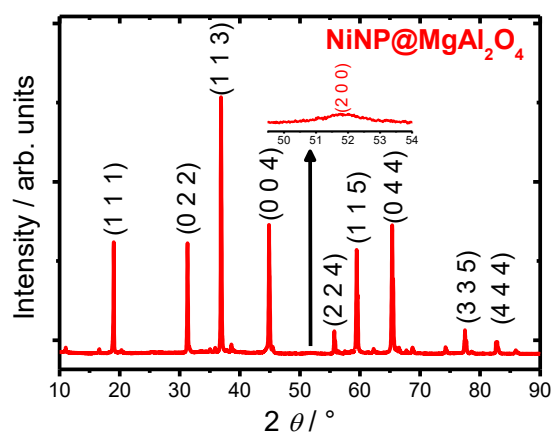

**Figure S8.** PXRD diffractogram of  $\text{NiNPMgAl}_2\text{O}_4$ . The  $(hkl)$  crystallographic planes correspond to  $\text{MgAl}_2\text{O}_4$  spinel structure.

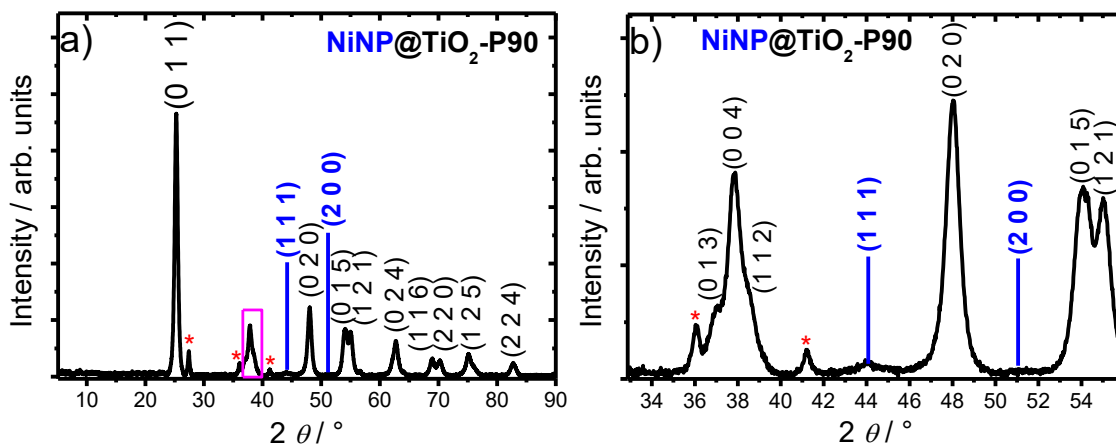

**Figure S9.** (a) Full PXRD diffractogram of  $\text{NiNP@TiO}_2$ . (b) Magnification of the  $33\text{--}56^\circ$  region. The black  $(hkl)$  crystallographic planes correspond to the anatase  $\text{TiO}_2$ , while the blue  $(hkl)$  ones correspond to fcc nickel(0). The \* symbol corresponds to rutile  $\text{TiO}_2$ .

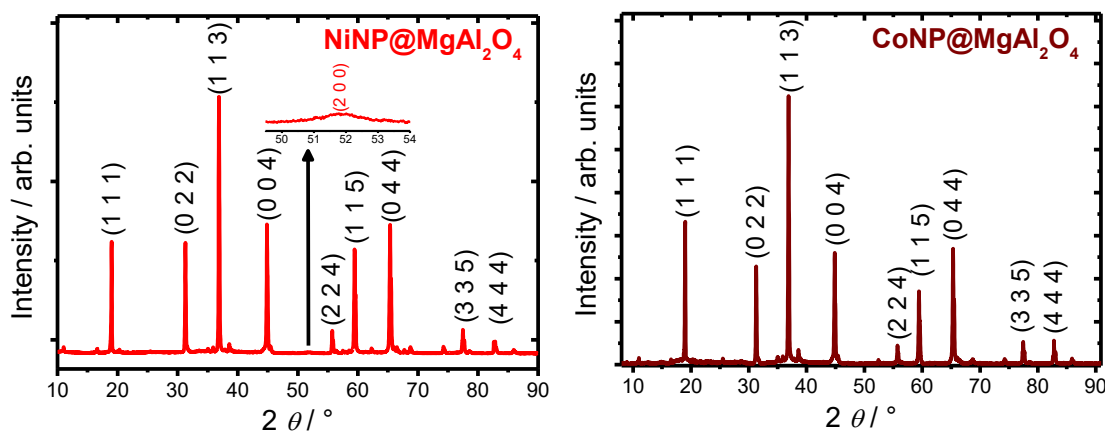

**Figure S10.** PXRD diffractogram of  $\text{NiNPMgAl}_2\text{O}_4$  (left) and  $\text{CoNPMgAl}_2\text{O}_4$  (right). The  $(hkl)$  crystallographic planes correspond to  $\text{MgAl}_2\text{O}_4$  spinel structure.

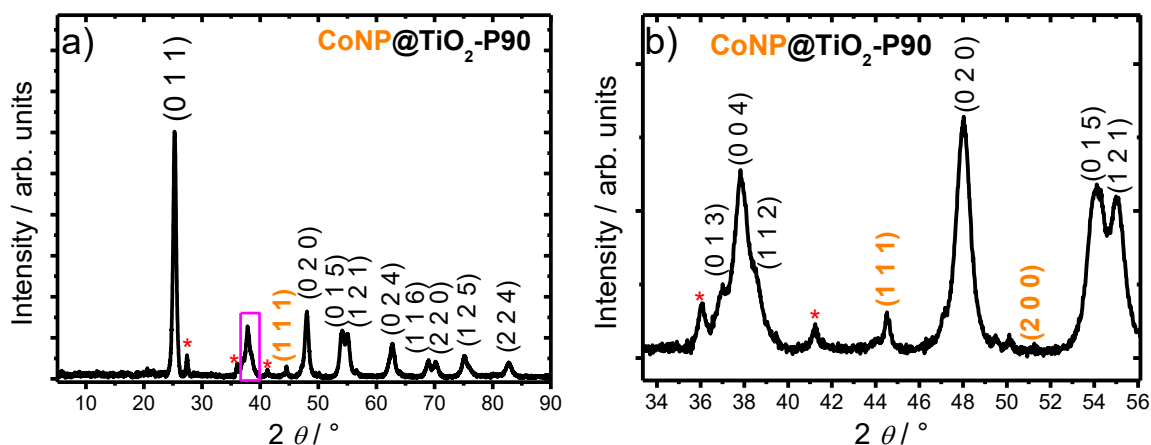

**Figure S11.** (a) Full PXRD diffractogram of CoNP@TiO<sub>2</sub>. (b) Magnification of the 33-56° region. The black  $(h k l)$  crystallographic planes correspond to the anatase TiO<sub>2</sub>, while the orange  $(h k l)$  crystallographic planes correspond to fcc cobalt (0). The \* symbol corresponds to rutile TiO<sub>2</sub>.

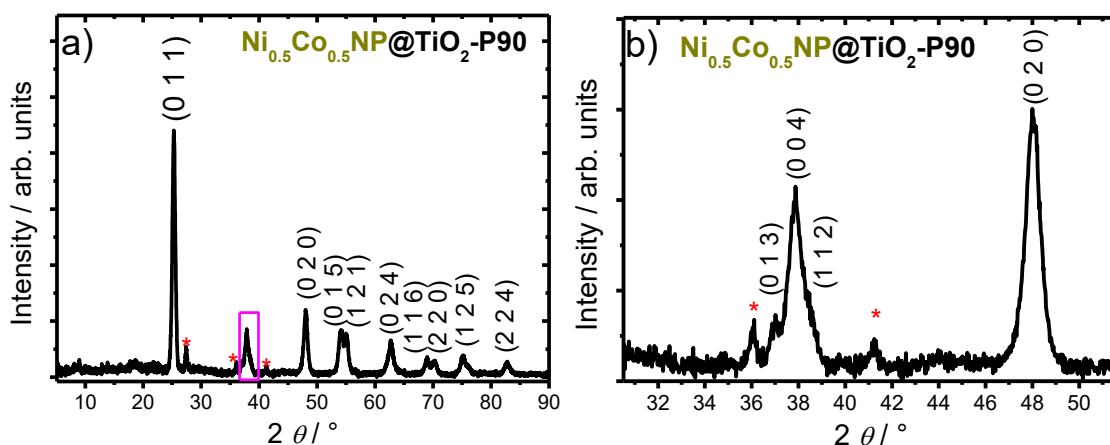

**Figure S12.** (a) Full PXRD diffractogram of NiCoNP@TiO<sub>2</sub>. (b) Magnification of the 33-52° region. The black  $(h k l)$  crystallographic planes correspond to the anatase TiO<sub>2</sub>. The \* symbol corresponds to rutile TiO<sub>2</sub>.

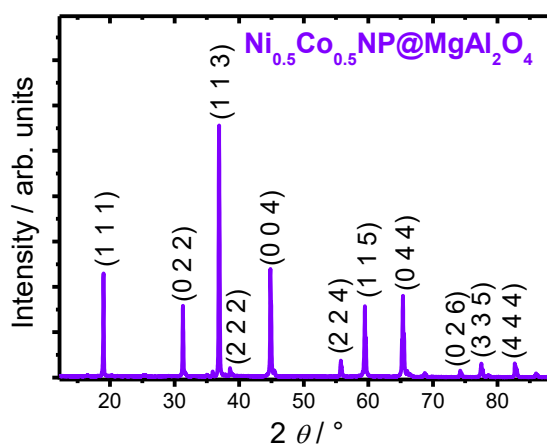

**Figure S13.** PXRD diffractogram of NiCoNP@MgAl<sub>2</sub>O<sub>4</sub>. The black  $(h k l)$  crystallographic planes correspond to MgAl<sub>2</sub>O<sub>4</sub> spinel structure.



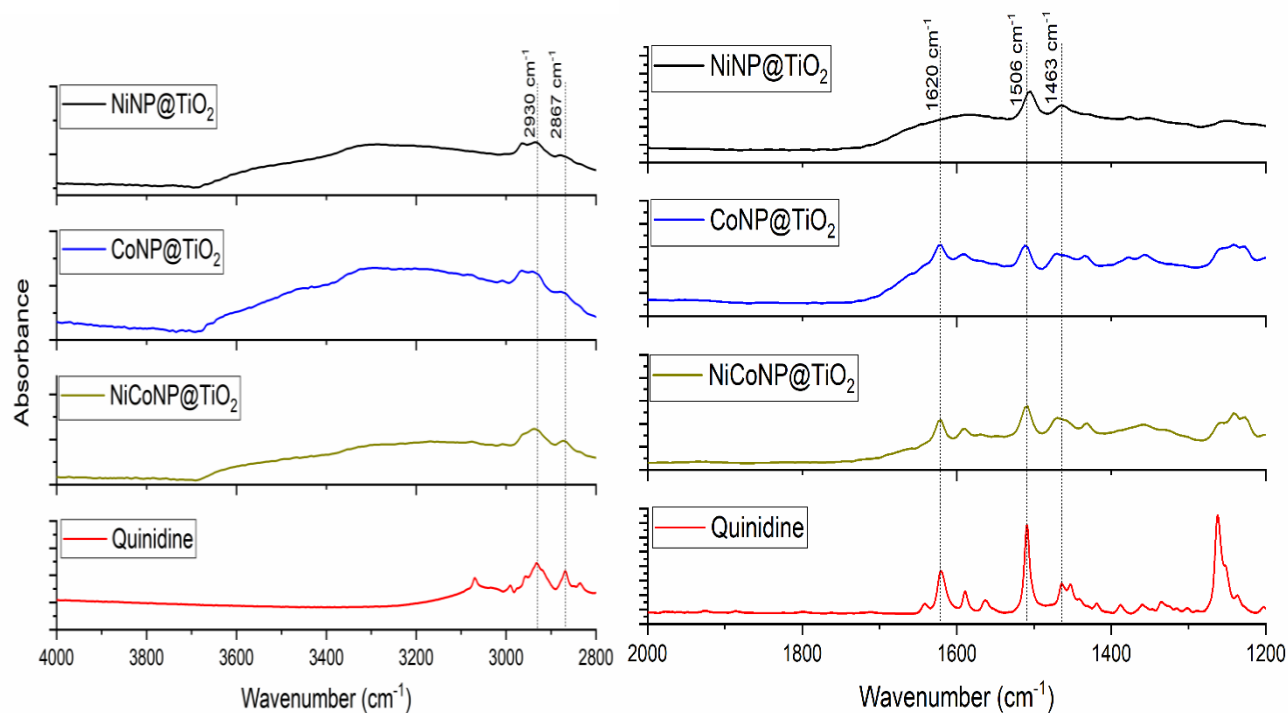

**Figure S14.** Stacked DRIFT spectra of  $\text{NiNP@TiO}_2$  (black),  $\text{CoNP@TiO}_2$  (blue),  $\text{NiCoNP@TiO}_2$  (green) with subtraction of  $\text{TiO}_2$  signals and quinidine (red).

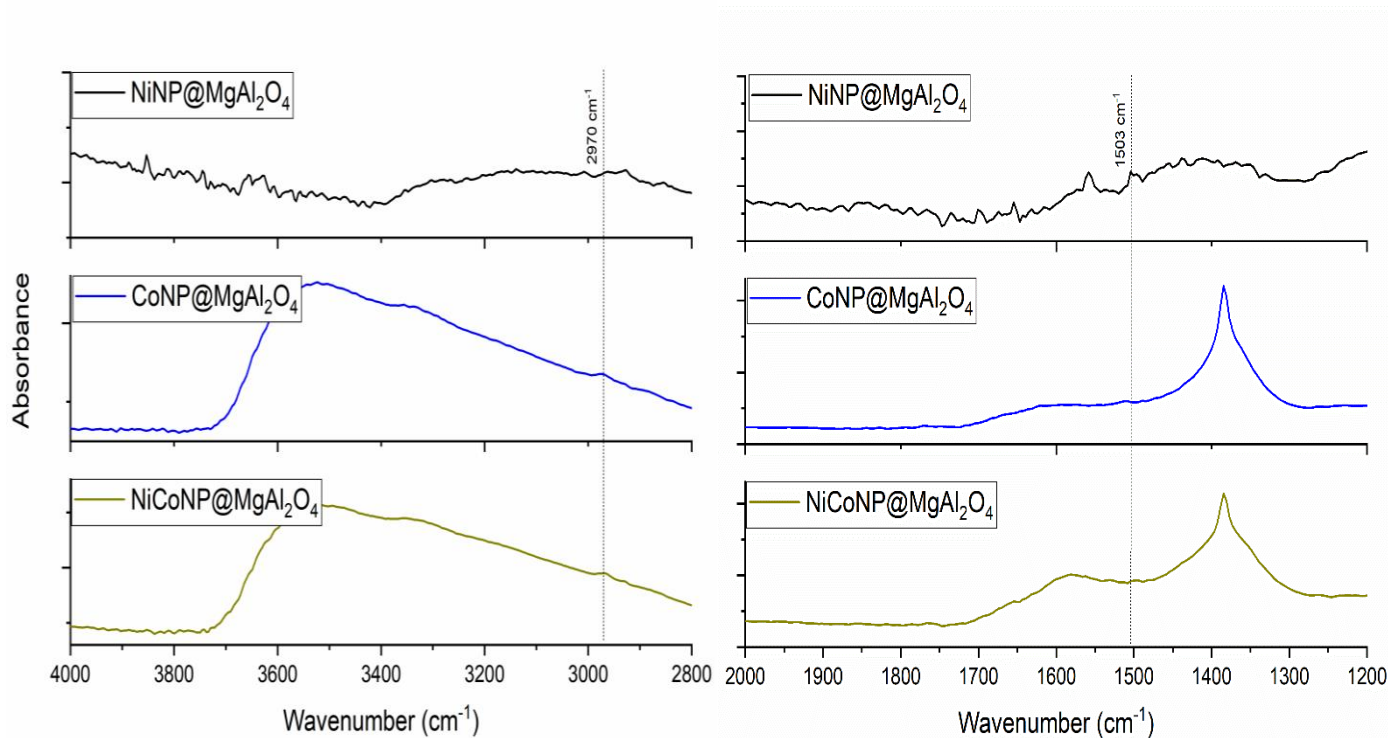

**Figure S15.** Stacked DRIFT spectra of  $\text{NiNP@MgAl}_2\text{O}_4$  (black),  $\text{CoNP@MgAl}_2\text{O}_4$  (blue) and  $\text{NiCoNP@MgAl}_2\text{O}_4$  (green) without subtraction of  $\text{MgAl}_2\text{O}_4$  signals.

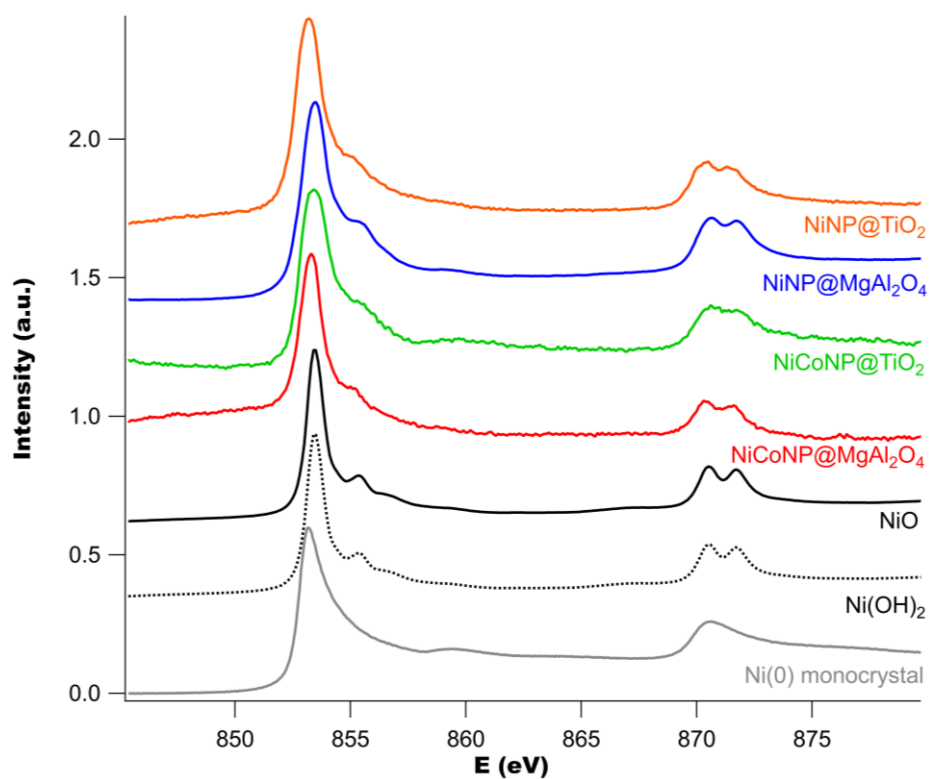

**Figure S16.** Nickel L<sub>2,3</sub> XAS spectra of NiNP@TiO<sub>2</sub> (orange), NiNP@MgAl<sub>2</sub>O<sub>4</sub> (blue), NiCoNP@TiO<sub>2</sub> (green), and NiCoNP@MgAl<sub>2</sub>O<sub>4</sub> (red) with references of NiO (black), Ni(OH)<sub>2</sub> (black dotted line) and Ni(0) (grey).

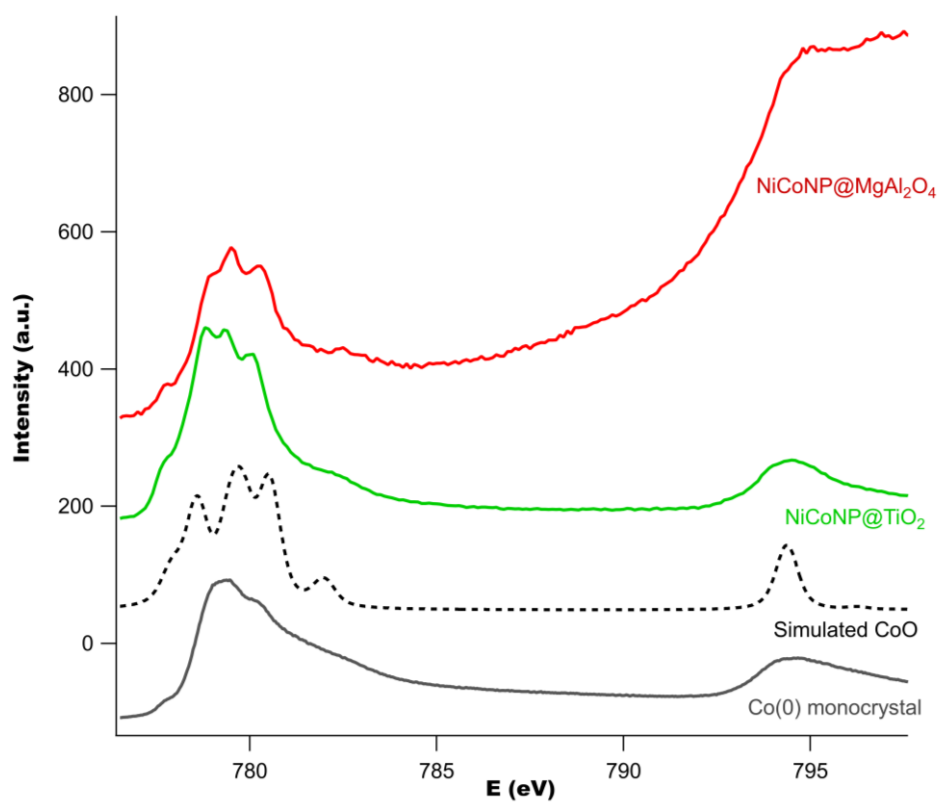

**Figure S17.** Cobalt L<sub>2,3</sub> XAS spectra of NiCoNP@MgAl<sub>2</sub>O<sub>4</sub> (red), NiCoNP@TiO<sub>2</sub> (green), Co(0) reference (grey), and an atomic multiplet simulation of Co(II) (black dotted line).

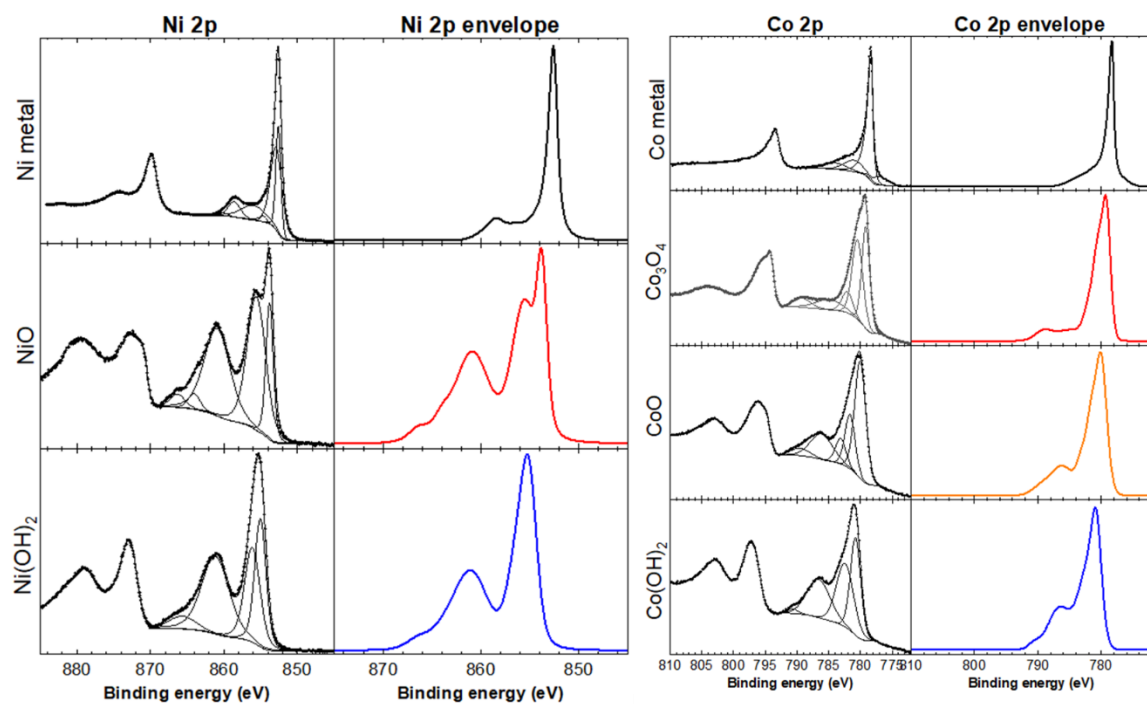

**Figure S18.** XPS analyses: Ni 2p XPS core level spectra of Ni metal, NiO and Ni(OH)<sub>2</sub> and corresponding envelopes from the Ni 2p<sub>3/2</sub> fit (left); Co 2p XPS core level spectra of Co metal, Co<sub>3</sub>O<sub>4</sub>, CoO and Co(OH)<sub>2</sub> and corresponding envelopes from the Co 2p<sub>3/2</sub> fit (right).

### 3. Tables

**Table S1.** Elemental and ICP-AES analyses.

| Sample                                  | ICP-AES  |          | Elemental Analysis |         |
|-----------------------------------------|----------|----------|--------------------|---------|
|                                         | Ni (wt%) | Co (wt%) | C (wt%)            | N (wt%) |
| NiNP@MgAl <sub>2</sub> O <sub>4</sub>   | 4.63     | --       | 0.60               | 0.02    |
| NiNP@TiO <sub>2</sub>                   | 4.62     | --       | 2.97               | 0.22    |
| CoNP@TiO <sub>2</sub>                   | --       | 4.56     | 0.72               | 0.07    |
| CoNP@MgAl <sub>2</sub> O <sub>4</sub>   | --       | 4.55     | 1.03               | 0.04    |
| NiCoNP@TiO <sub>2</sub>                 | 2.98     | 1.77     | 1.24               | 0.06    |
| NiCoNP@MgAl <sub>2</sub> O <sub>4</sub> | 2.76     | 2.62     | 0.78               | 0.04    |

**Table S2.** XPS quantification (in at.%) of MgAl<sub>2</sub>O<sub>4</sub>, NiNP@MgAl<sub>2</sub>O<sub>4</sub> and NiCoNP@MgAl<sub>2</sub>O<sub>4</sub>.

| Ele-<br>ments | Binding en-<br>ergy (eV) | Assignment                                                          | At.%<br>MgAl <sub>2</sub><br>O <sub>4</sub> | At.%<br>Ni@MgA<br>l <sub>2</sub> O <sub>4</sub> | At.%<br>NiCo@MgAl <sub>2</sub> O<br><sub>4</sub> |
|---------------|--------------------------|---------------------------------------------------------------------|---------------------------------------------|-------------------------------------------------|--------------------------------------------------|
| C 1s          | 285                      | Contamina-<br>tion                                                  | 14                                          | 20                                              | 6                                                |
|               | 286.7                    |                                                                     | 1.5                                         | 2                                               | 1                                                |
|               | 289.3                    |                                                                     | 1                                           | 1.5                                             | 1                                                |
| O 1s          | 531.1                    | Al <sub>2</sub> O <sub>3</sub>                                      | 36                                          | Total O:                                        | 30                                               |
|               | 532.4                    | MgAl <sub>2</sub> O <sub>4</sub>                                    | 13                                          | 46                                              | 23                                               |
| Mg 1s         | 1304                     | MgAl <sub>2</sub> O <sub>4</sub>                                    | 3.5                                         | 1.5                                             | 6                                                |
| Al 2p         | 74.5                     | MgAl <sub>2</sub> O <sub>4</sub> /Al <sub>2</sub><br>O <sub>3</sub> | 31                                          | 16.5                                            | 31                                               |
| Ni 2p         | 852.6 (maxi-<br>mum)     | Ni metal<br>NiO<br>Ni(OH) <sub>2</sub>                              | -                                           | 12.5                                            | 1                                                |
|               | 854.0 (maxi-<br>mum)     |                                                                     |                                             | 18%                                             | 17%                                              |
|               | 856.0 (maxi-<br>mum)     |                                                                     |                                             | 26%                                             | 53%                                              |
|               | 856.0 (maxi-<br>mum)     |                                                                     |                                             | 56%                                             | 30%                                              |
| Co 2p         | 778.1 (maxi-<br>mum)     | Co metal<br>CoO<br>Co(OH) <sub>2</sub>                              |                                             |                                                 | 1                                                |
|               | 780.0 (maxi-<br>mum)     |                                                                     |                                             |                                                 | 16%                                              |
|               | 781.4 (maxi-<br>mum)     |                                                                     |                                             |                                                 | 40%                                              |
|               | 781.4 (maxi-<br>mum)     |                                                                     |                                             |                                                 | 44%                                              |

**Table S3.** Catalyst screening for the catalyzed hydrogenation of oleic acid using NiNP@TiO<sub>2</sub>, NiCoNP@TiO<sub>2</sub>, NiNP@MgAl<sub>2</sub>O<sub>4</sub> and NiCoNP@MgAl<sub>2</sub>O<sub>4</sub> composite materials.<sup>a</sup>

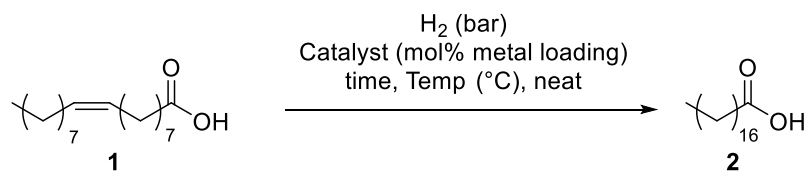

| Entry           | Catalyst                                | Metal loading (mol%) | pH <sub>2</sub> (bar) | Temperature (°C) | Time   | Conv. (%) <sup>b</sup> |
|-----------------|-----------------------------------------|----------------------|-----------------------|------------------|--------|------------------------|
| 1               | NiNP@TiO <sub>2</sub>                   | 10                   | 10                    | 100              | 24 h   | 100                    |
| 2               | NiNP@TiO <sub>2</sub>                   | 5                    | 10                    | 100              | 24 h   | 100                    |
| 3               | NiNP@TiO <sub>2</sub>                   | 1                    | 5                     | 180              | 30 min | 65                     |
| 4               | NiNP@TiO <sub>2</sub>                   | 0.3                  | 5                     | 180              | 30 min | 10                     |
| 5               | CoNP@TiO <sub>2</sub>                   | 1                    | 5                     | 180              | 30 min | 10                     |
| 6               | NiCoNP@TiO <sub>2</sub>                 | 10                   | 10                    | 100              | 24 h   | 38                     |
| 7               | NiCoNP@TiO <sub>2</sub>                 | 1                    | 5                     | 180              | 30 min | 31                     |
| 8               | NiCoNP@TiO <sub>2</sub>                 | 0.5                  | 5                     | 180              | 30 min | 19                     |
| 9               | NiNP@MgAl <sub>2</sub> O <sub>4</sub>   | 5                    | 10                    | 100              | 24 h   | 100                    |
| 10              | NiNP@MgAl <sub>2</sub> O <sub>4</sub>   | 2                    | 5                     | 180              | 30 min | 100                    |
| 11              | NiNP@MgAl <sub>2</sub> O <sub>4</sub>   | 1                    | 5                     | 180              | 30 min | 96                     |
| 12              | NiNP@MgAl <sub>2</sub> O <sub>4</sub>   | 0.2                  | 5                     | 180              | 30 min | 32                     |
| 13              | NiNP@MgAl <sub>2</sub> O <sub>4</sub>   | 0.2                  | 5                     | 100              | 2 h    | 13                     |
| 14              | CoNP@MgAl <sub>2</sub> O <sub>4</sub>   | 1                    | 5                     | 180              | 30 min | 12                     |
| 15              | NiCoNP@MgAl <sub>2</sub> O <sub>4</sub> | 10                   | 10                    | 100              | 24 h   | 100                    |
| 16              | NiCoNP@MgAl <sub>2</sub> O <sub>4</sub> | 5                    | 10                    | 100              | 24 h   | 100                    |
| 17              | NiCoNP@MgAl <sub>2</sub> O <sub>4</sub> | 1                    | 5                     | 180              | 30 min | 93                     |
| 18              | NiCoNP@MgAl <sub>2</sub> O <sub>4</sub> | 0.6                  | 5                     | 180              | 30 min | 91                     |
| 19 <sup>c</sup> | NiCoNP@MgAl <sub>2</sub> O <sub>4</sub> | 0.1                  | 5                     | 180              | 30 min | 50                     |
| 20              | NiCoNP@MgAl <sub>2</sub> O <sub>4</sub> | 0.1                  | 5                     | 100              | 2 h    | n.d.                   |

<sup>a</sup> Reaction conditions: 1 mmol of oleic acid (**1**), metal content determined by ICP-AES. <sup>b</sup> Determined by <sup>1</sup>H NMR using 4-methylanisole as internal standard; only stearic acid was observed. <sup>c</sup> Reaction carried out using 5 mmol of substrate.

**Table S4.** Literature data on the catalyzed hydrogenation of oleic acid.

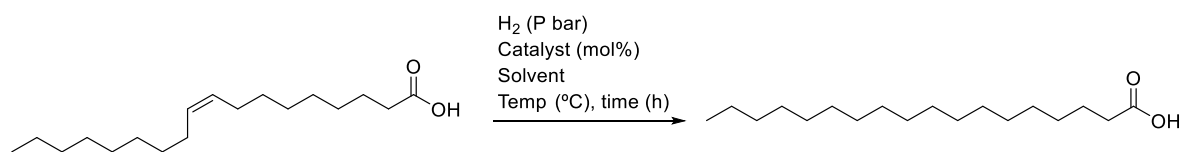

| Catalyst                                                        | Solvent          | P <sub>H<sub>2</sub></sub><br>(bar)    | T<br>(°C) | Time<br>(h) | Yield (%)              | Reference                                             |
|-----------------------------------------------------------------|------------------|----------------------------------------|-----------|-------------|------------------------|-------------------------------------------------------|
| Pd@SiO <sub>2</sub><br>(0.1 mol%)                               | MeOH             | 1                                      | rt        | 3           | >97                    | <i>Org. Process. Res. Dev.</i> <b>2012</b> , 16, 1307 |
| Ag@SiO <sub>2</sub><br>(0.5 mol%)                               | EtOH             | 1                                      | 50        | 5           | 91                     | <i>Mater. Lett.</i> <b>2011</b> , 65, 1037            |
| η <sup>6</sup> -arene Ru diphos-<br>phine complex<br>(0.2 mol%) | DME              | 68<br>(P <sub>CO<sub>2</sub></sub> 12) | 160       | 20          | (98% meth-<br>ylester) | <i>Chem. Sci.</i> <b>2020</b> , 11, 6766              |
| Pt/C<br>(5 wt%)                                                 | H <sub>2</sub> O | 3.5                                    | 300       | 9           | 75                     | <i>Green Chem.</i> <b>2014</b> , 16, 1507             |
| Pt-Re/C<br>(5 and 4 wt%, respec-<br>tively)                     | H <sub>2</sub> O | 3.5                                    | 300       | 9           | 65                     | <i>Green Chem.</i> <b>2014</b> , 16, 1507             |
| Fe/mesoporous SiO <sub>2</sub><br>NP                            | hexane           | 30                                     | 290       | 6           | 83                     | <i>J. Catal.</i> <b>2014</b> , 314, 142               |
| Ni-Mo/Al <sub>2</sub> O <sub>3</sub><br>(5 wt%)                 | dodecane         | 49                                     | 320       | 4           | 61                     | <i>Ind. Eng. Chem. Res.</i> <b>2017</b> , 56, 5547    |
| Ni/ZnAl <sub>2</sub> O <sub>4</sub><br>(10 wt%)                 | Decalin          | 25                                     | 280       | 6           | 83                     | <i>Catal. Sci. Technol.</i> <b>2019</b> , 9, 213      |
| Co@Chitosan-700 (2.9<br>mol%)                                   | H <sub>2</sub> O | 40                                     | 150       | 18          | 62 (conversion)        | <i>Sci. Adv.</i> <b>2018</b> , 4, eaau1248            |
